# Supplementary figures and images for: Antioxidant-rich brilliant polymeric nanocomposites for quick and efficient non-enzymatic hydrogen peroxide sensor
Source: Royal Society of Chemistry journal article supplement (doi:10.1039/d4ra01768d), 2024-01-01

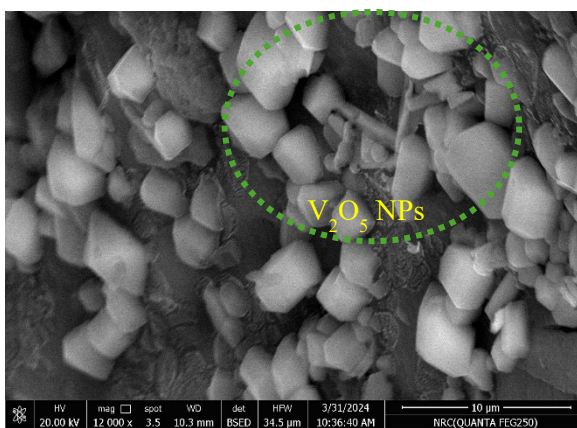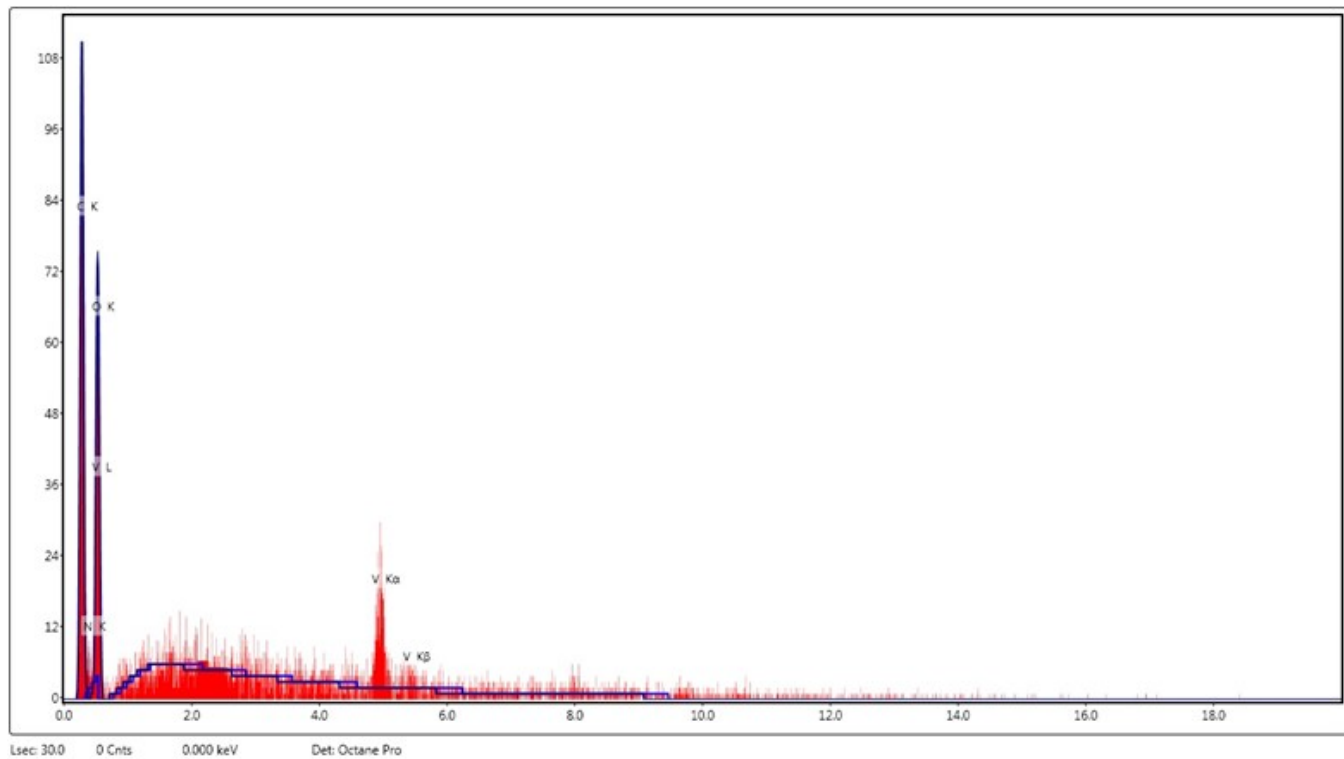

**Figure S1.** SEM and EDX of poly (MMA/DMAEMA/CHAA)-V<sub>2</sub>O<sub>5</sub>.

Supplement: d4ra01768d1.pdf [file d4ra01768d1.pdf]
